# Supplementary material for: A comprehensive analysis of cardiovascular mortality trends in Peru from 2017 to 2022: Insights from 183,386 deaths of the national death registry
Source: PubMed Central journal article supplement (PMC10946053; doi:10.1016/j.ahjo.2023.100335), 2023-10-20
Supplement: mmc2.pdf [file mmc2.pdf]

Supplementary Figure 2 A. Cardiovascular mortality in Peru by departments and phenotype and sex between 2017 and 2022

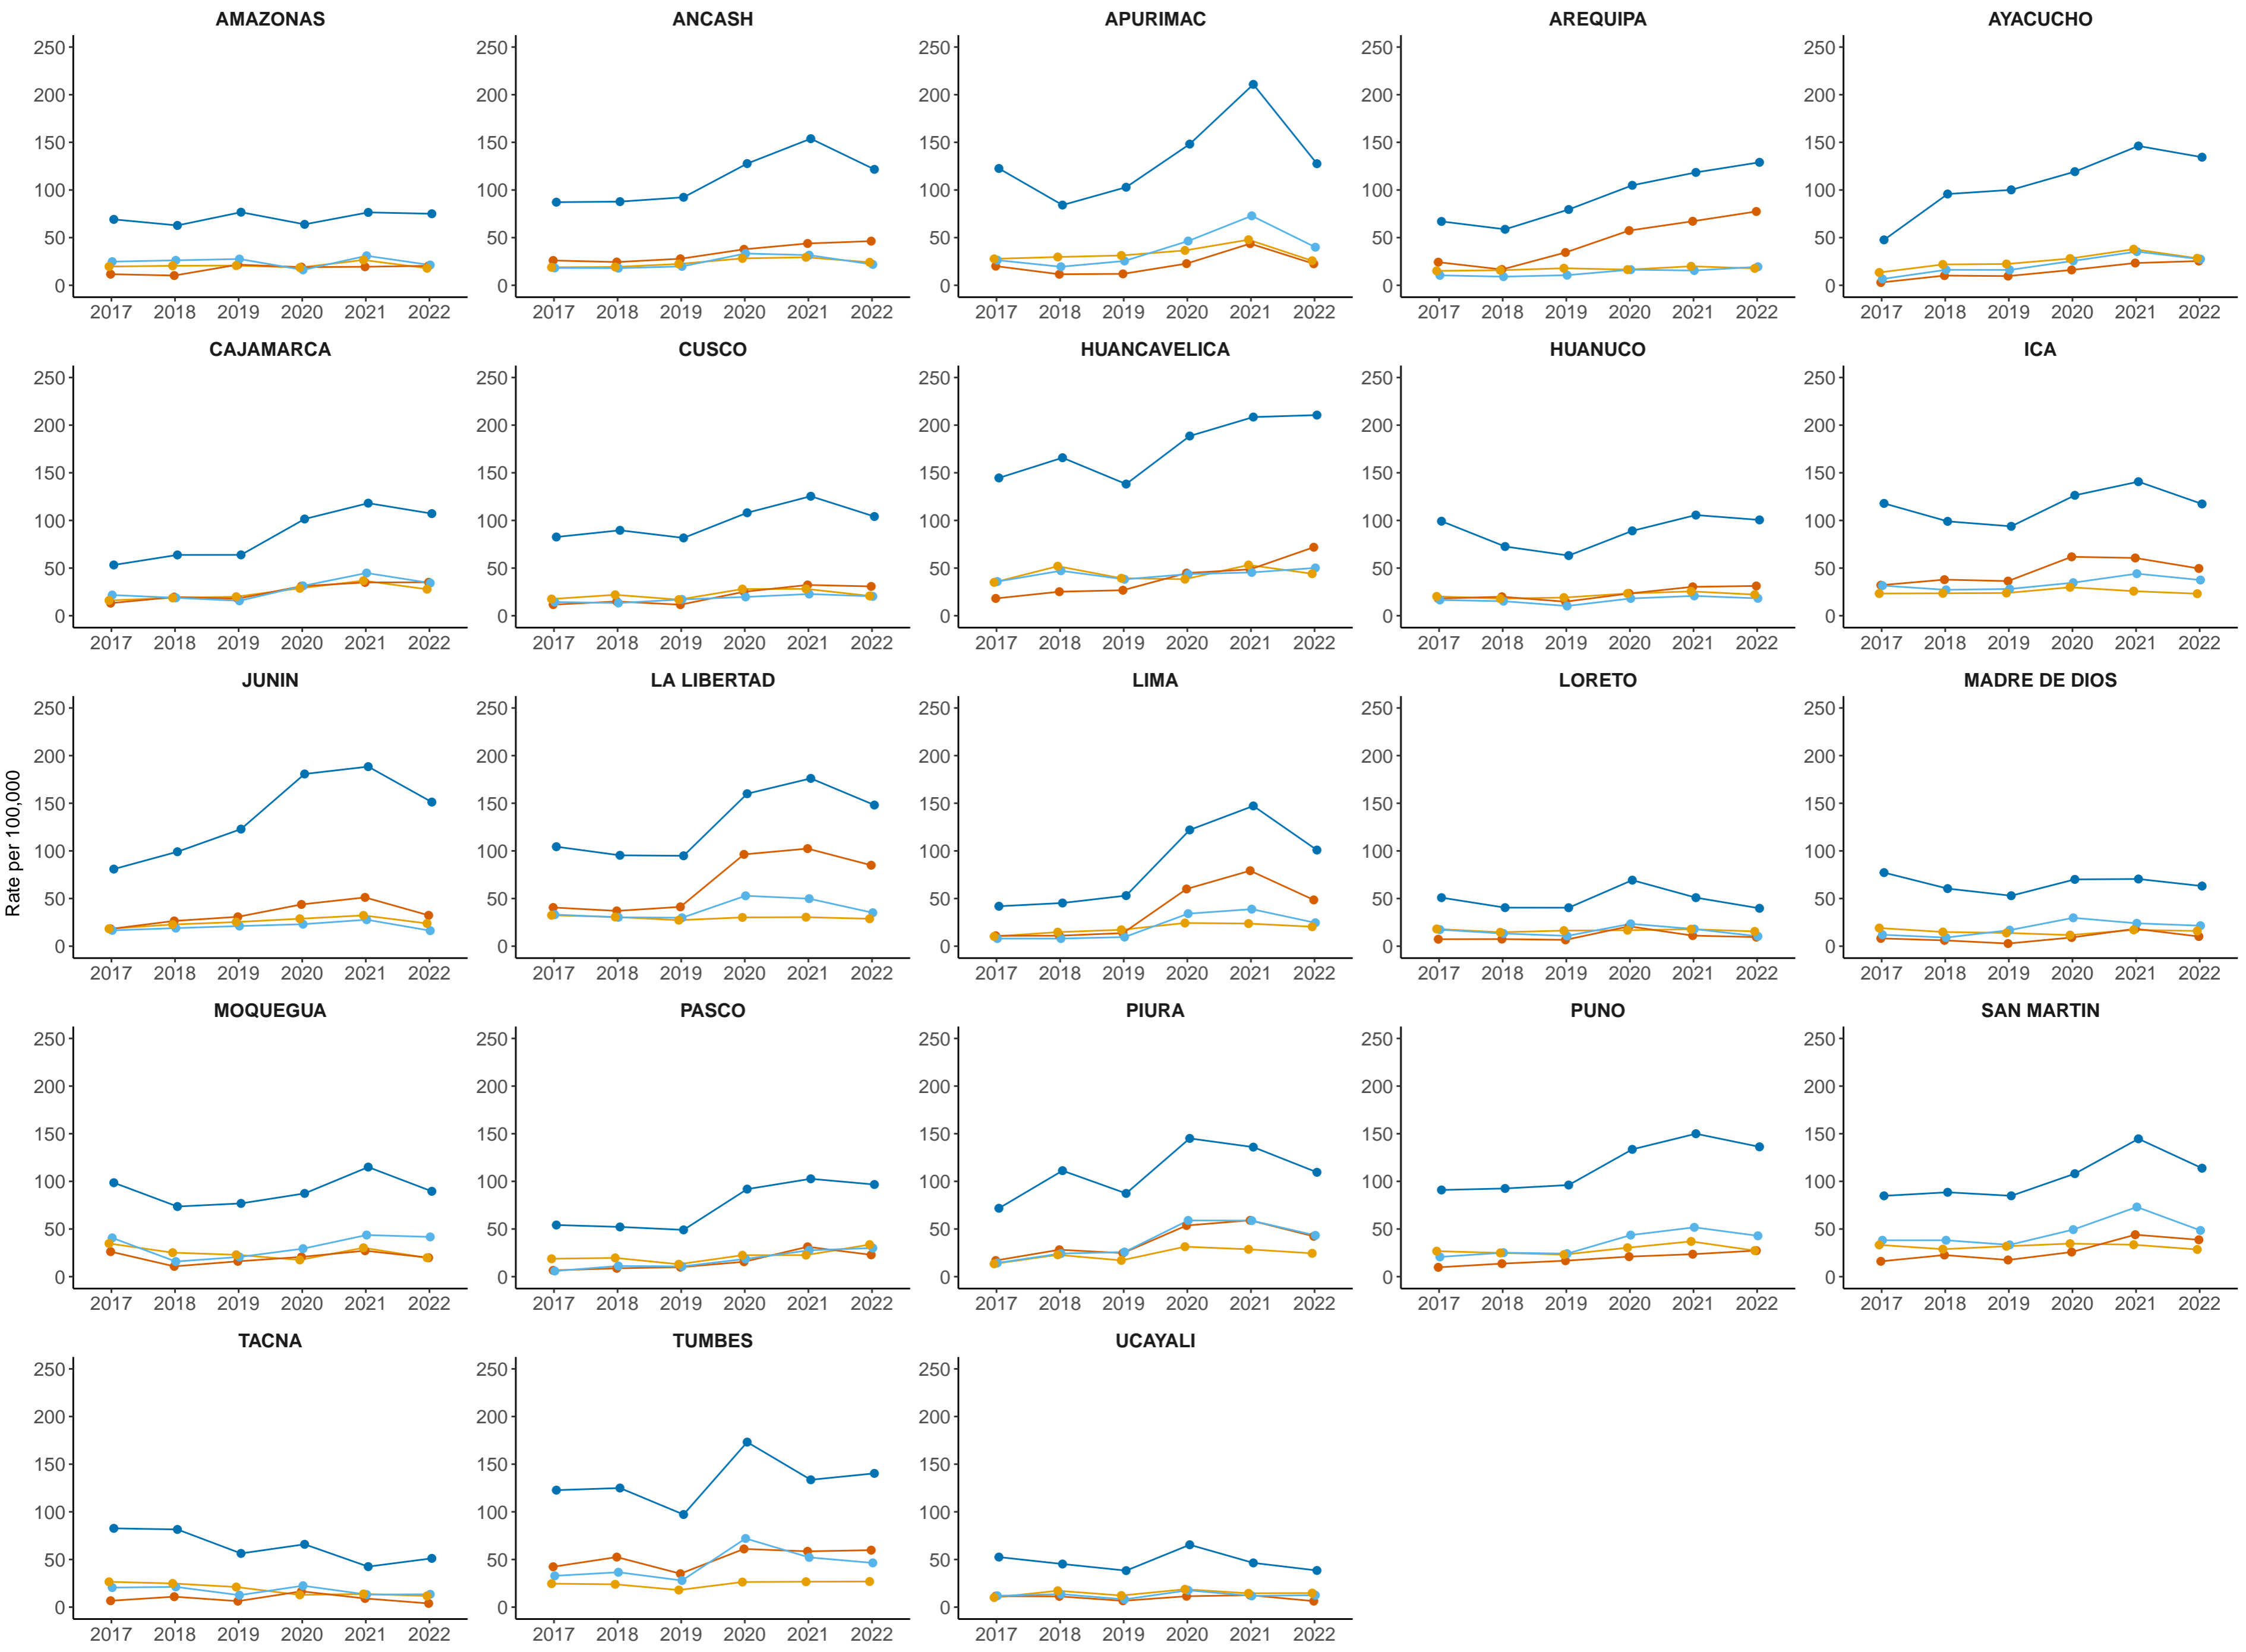

● Cerebrovascular 
 ● Coronary 
 ● Hypertension 
 ● Total

Year
