# Supplementary material for: A comprehensive analysis of cardiovascular mortality trends in Peru from 2017 to 2022: Insights from 183,386 deaths of the national death registry
Source: PubMed Central journal article supplement (PMC10946053; doi:10.1016/j.ahjo.2023.100335), 2023-10-20
Supplement: mmc3.pdf [file mmc3.pdf]

Supplementary Figure 2 B. Cardiovascular mortality in Peru by departments and phenotype and sex between 2017 and 2022

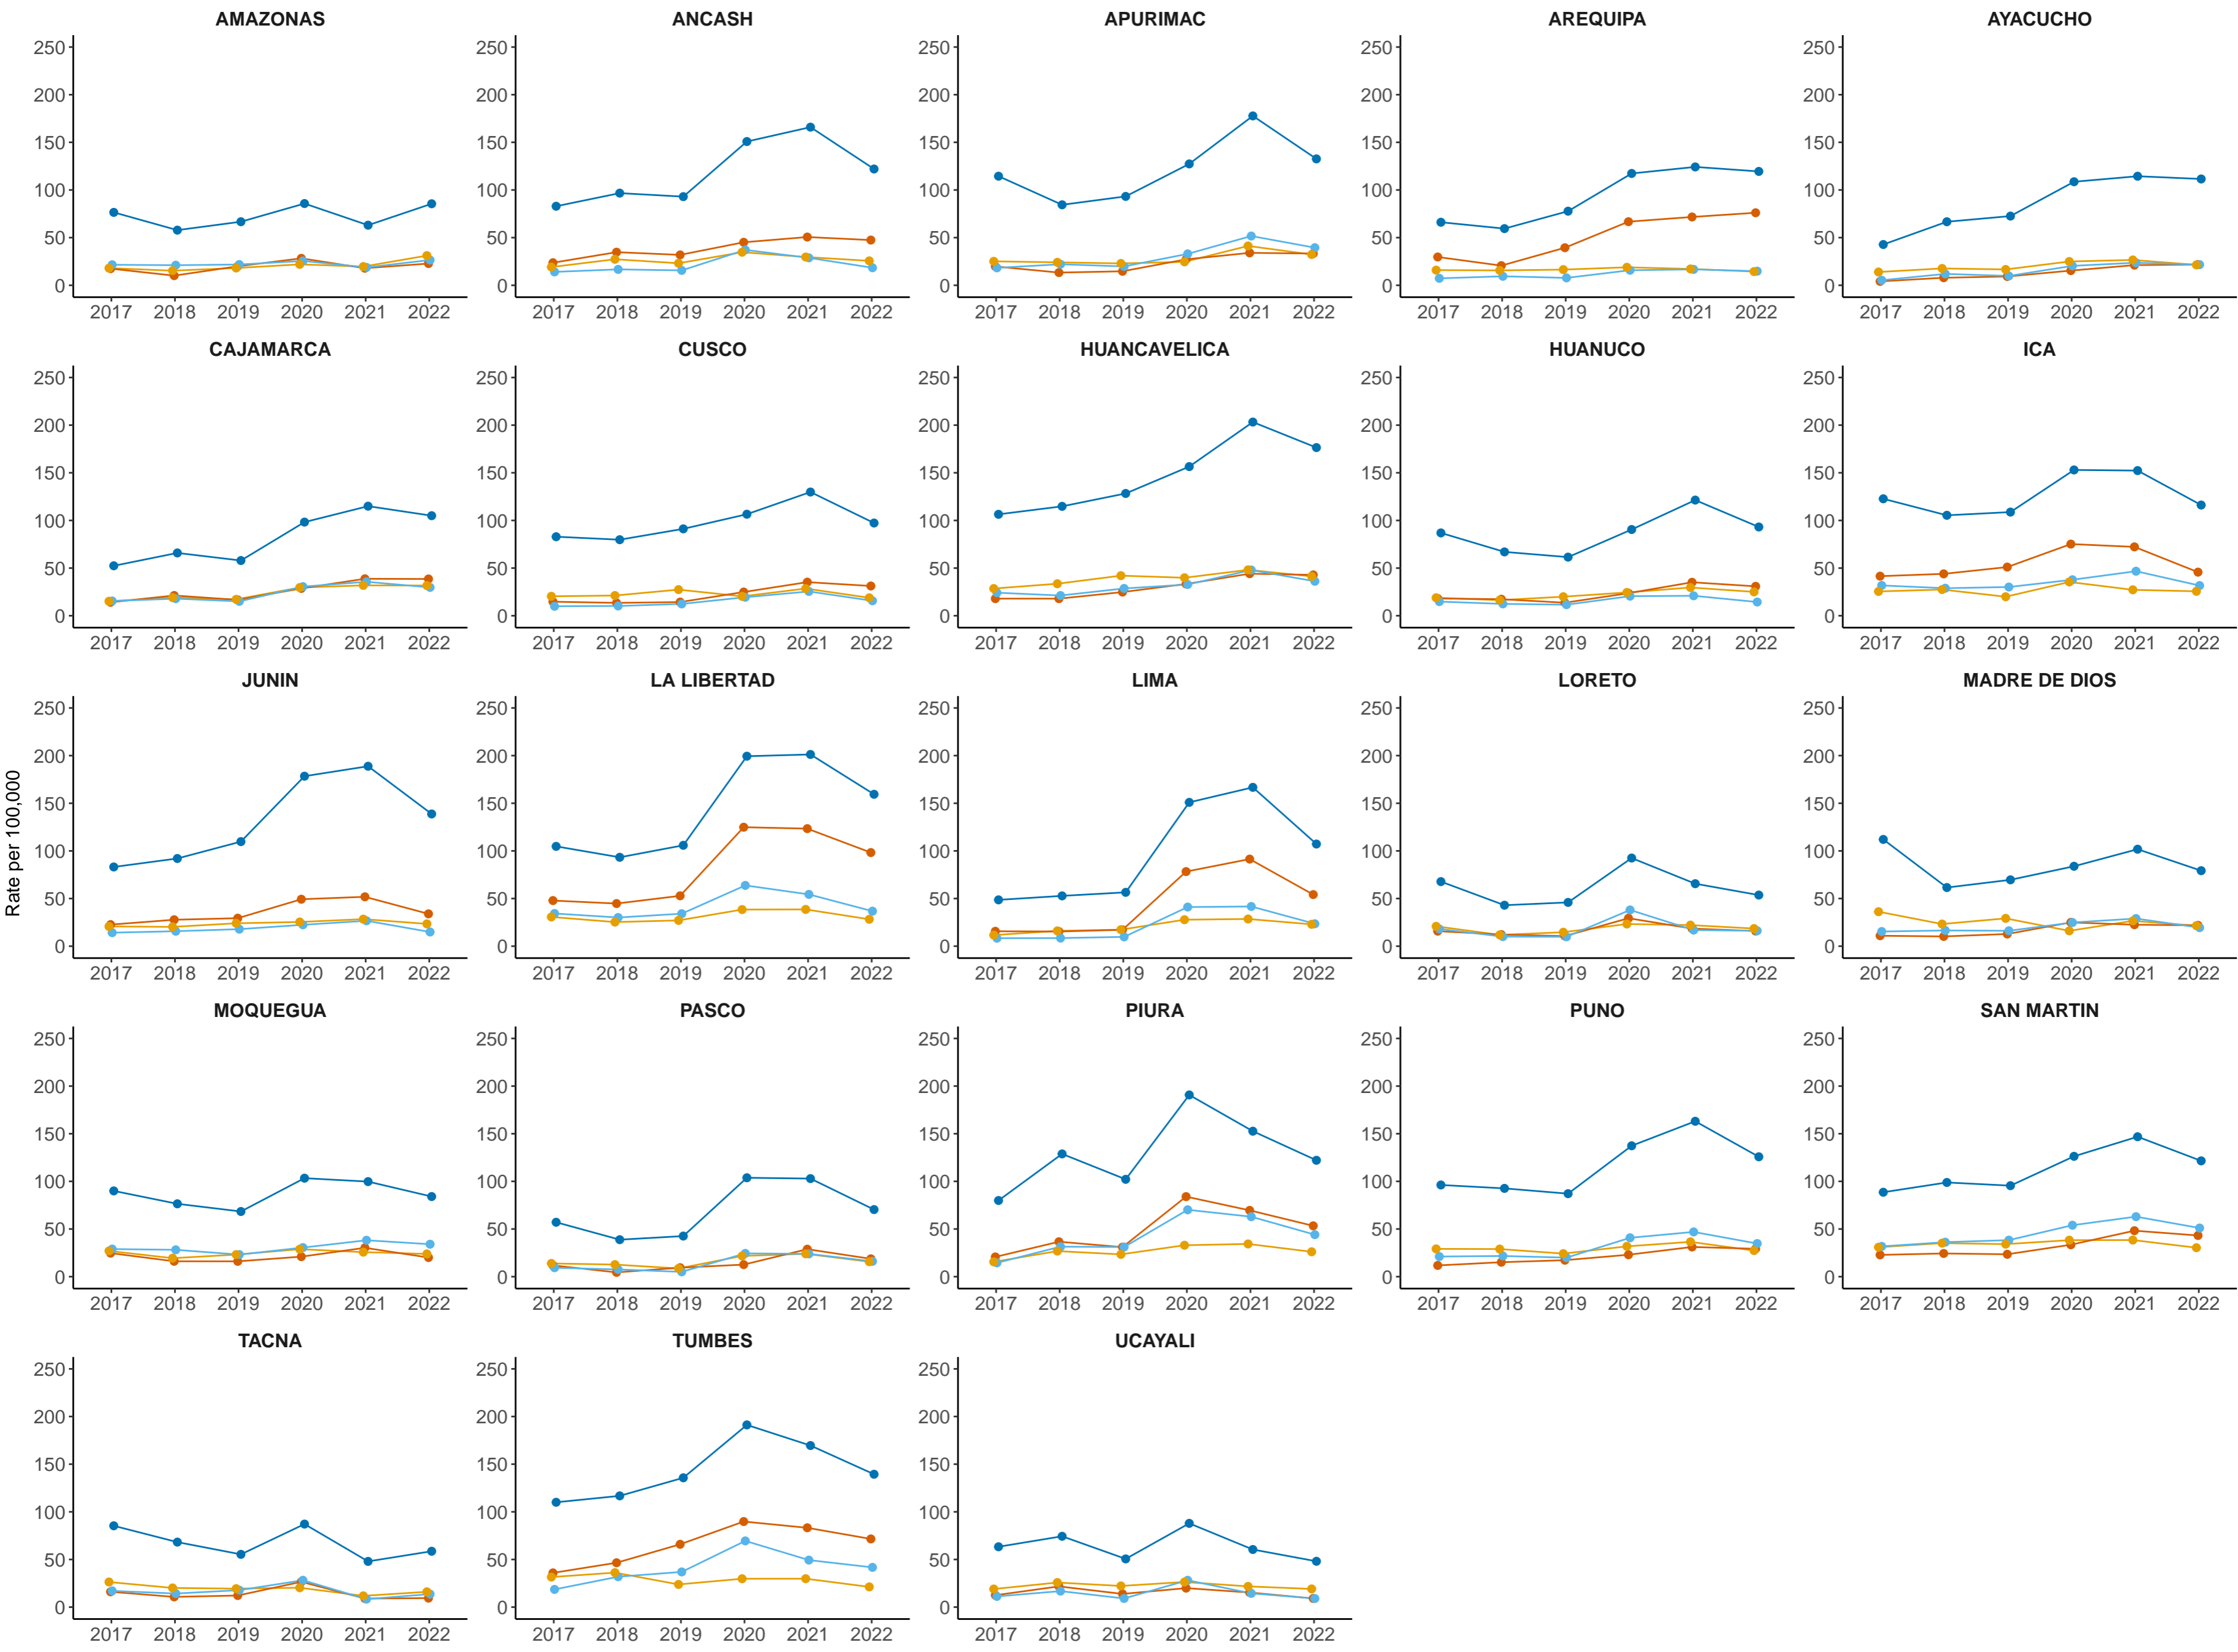

—●— Cerebrovascular —●— Coronary —●— Hypertension —●— Total

Year
