# Supplementary material for: A comprehensive analysis of cardiovascular mortality trends in Peru from 2017 to 2022: Insights from 183,386 deaths of the national death registry
Source: PubMed Central journal article supplement (PMC10946053; doi:10.1016/j.ahjo.2023.100335), 2023-10-20

Supplementary Figure 3. Geographic and temporal profiles of deaths caused by coronary diseases in Peru between 2017 and 2022

2017

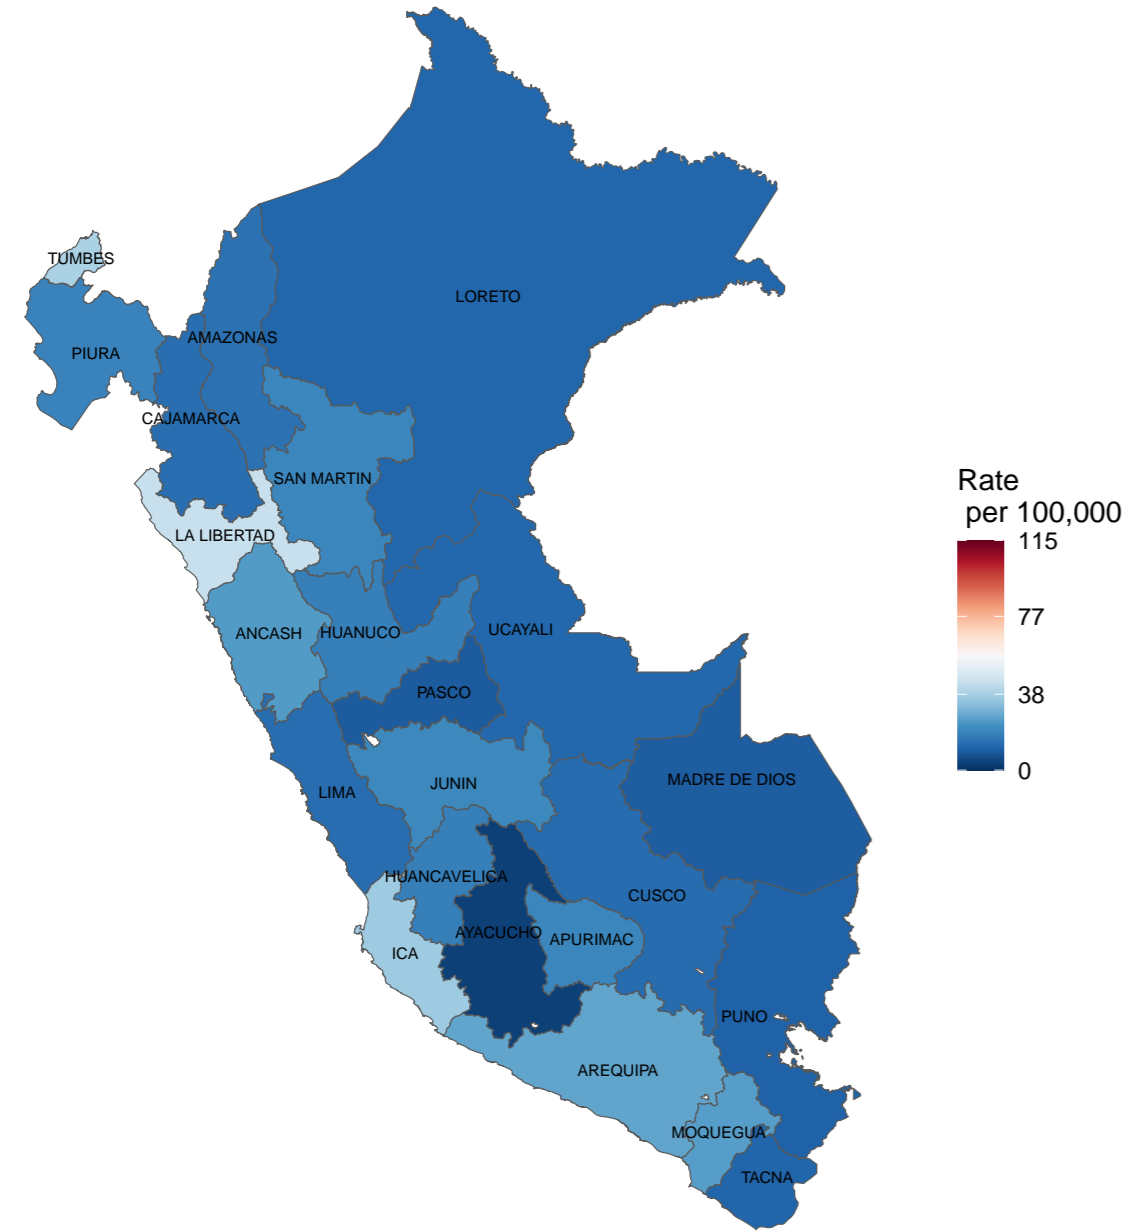

2018

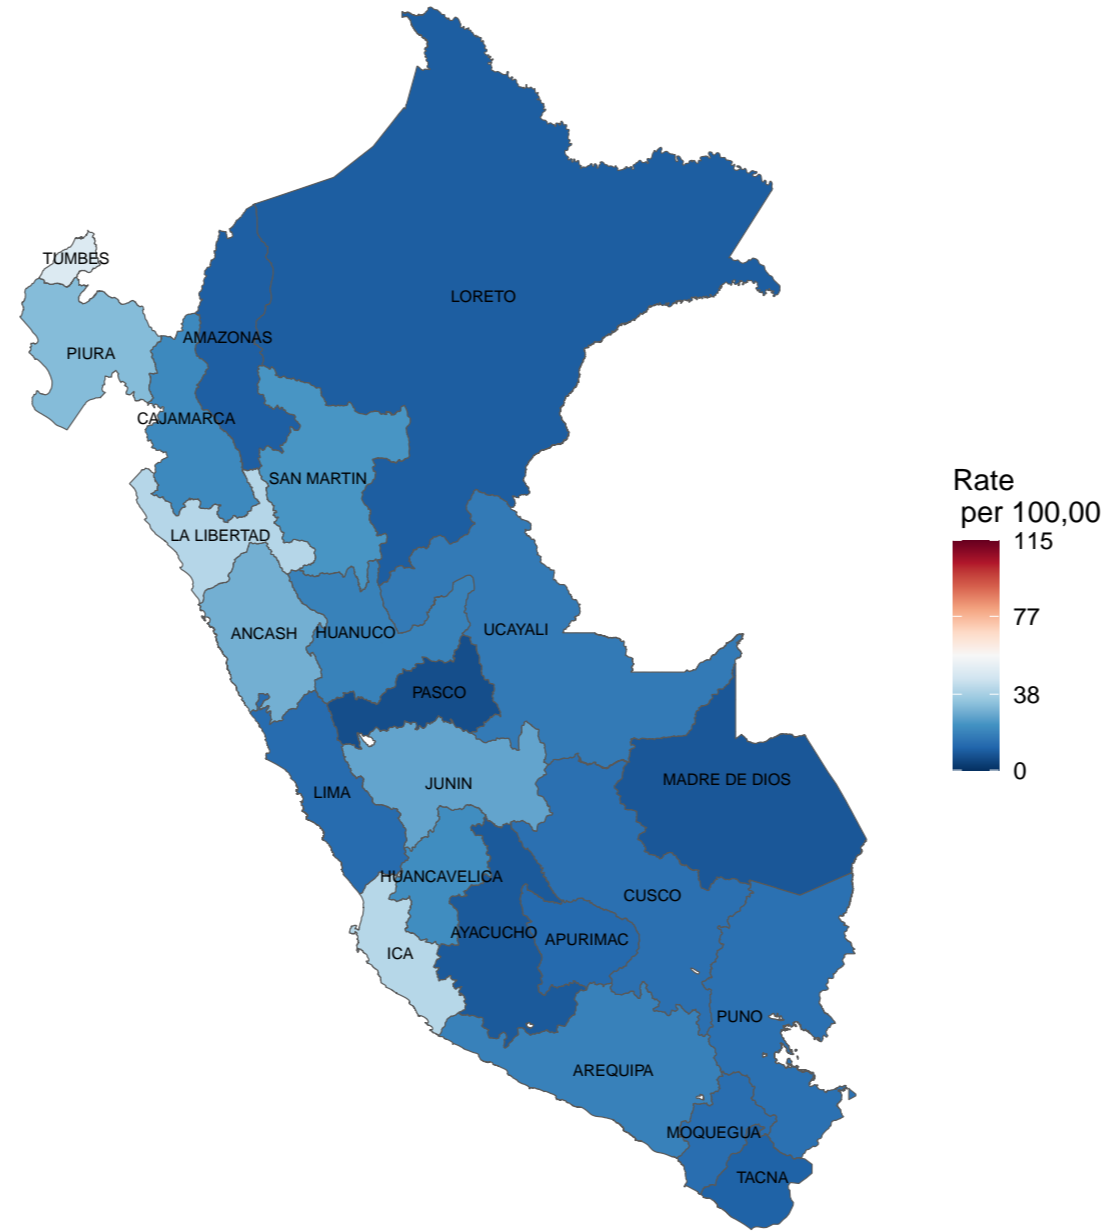

2019

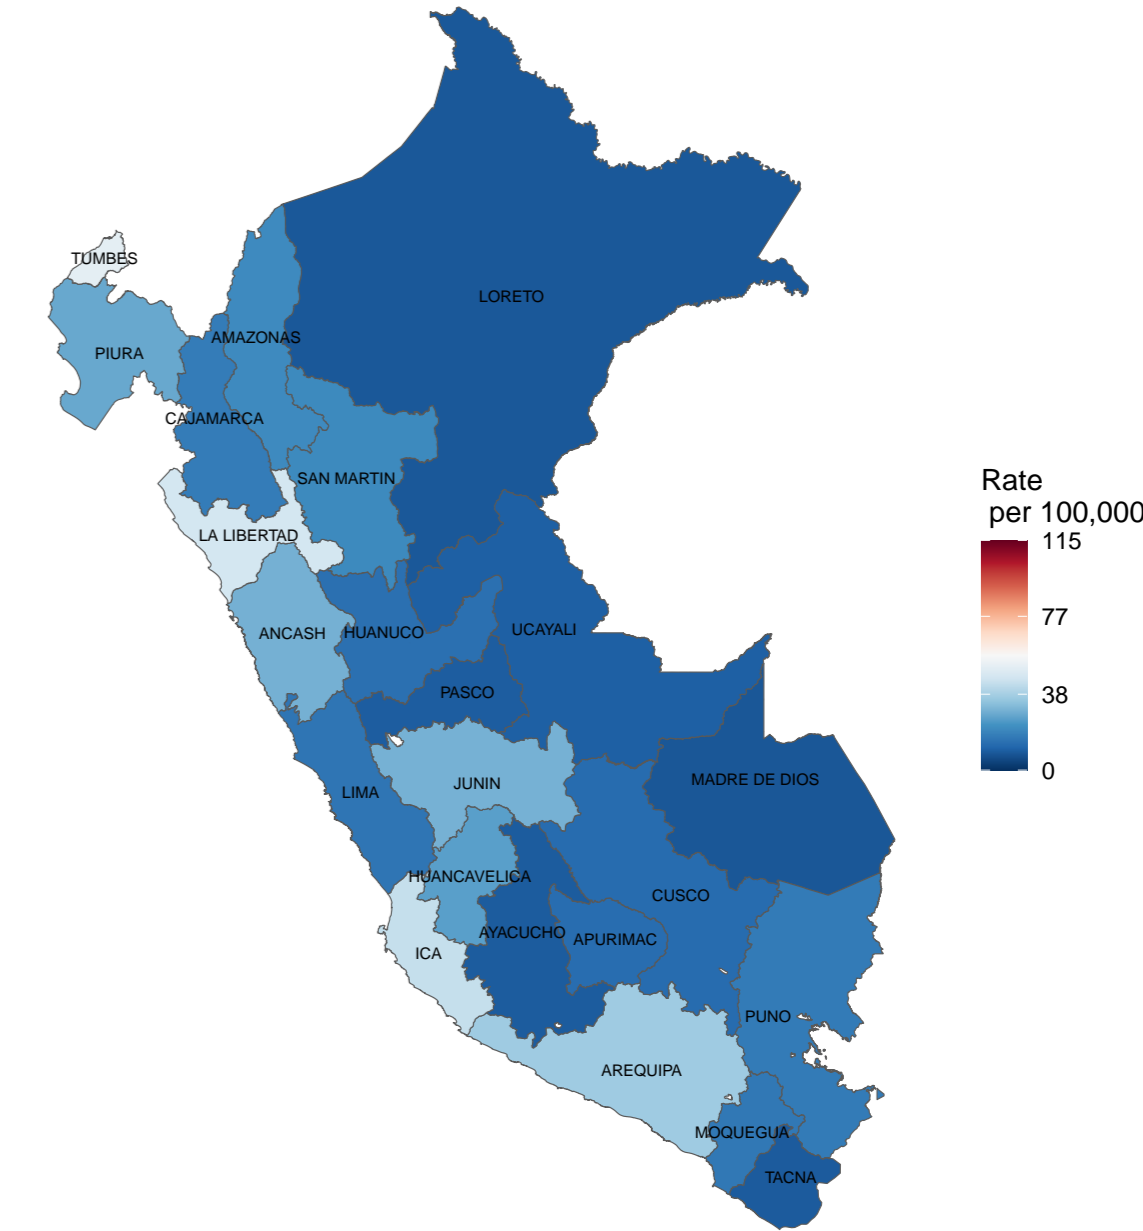

2020

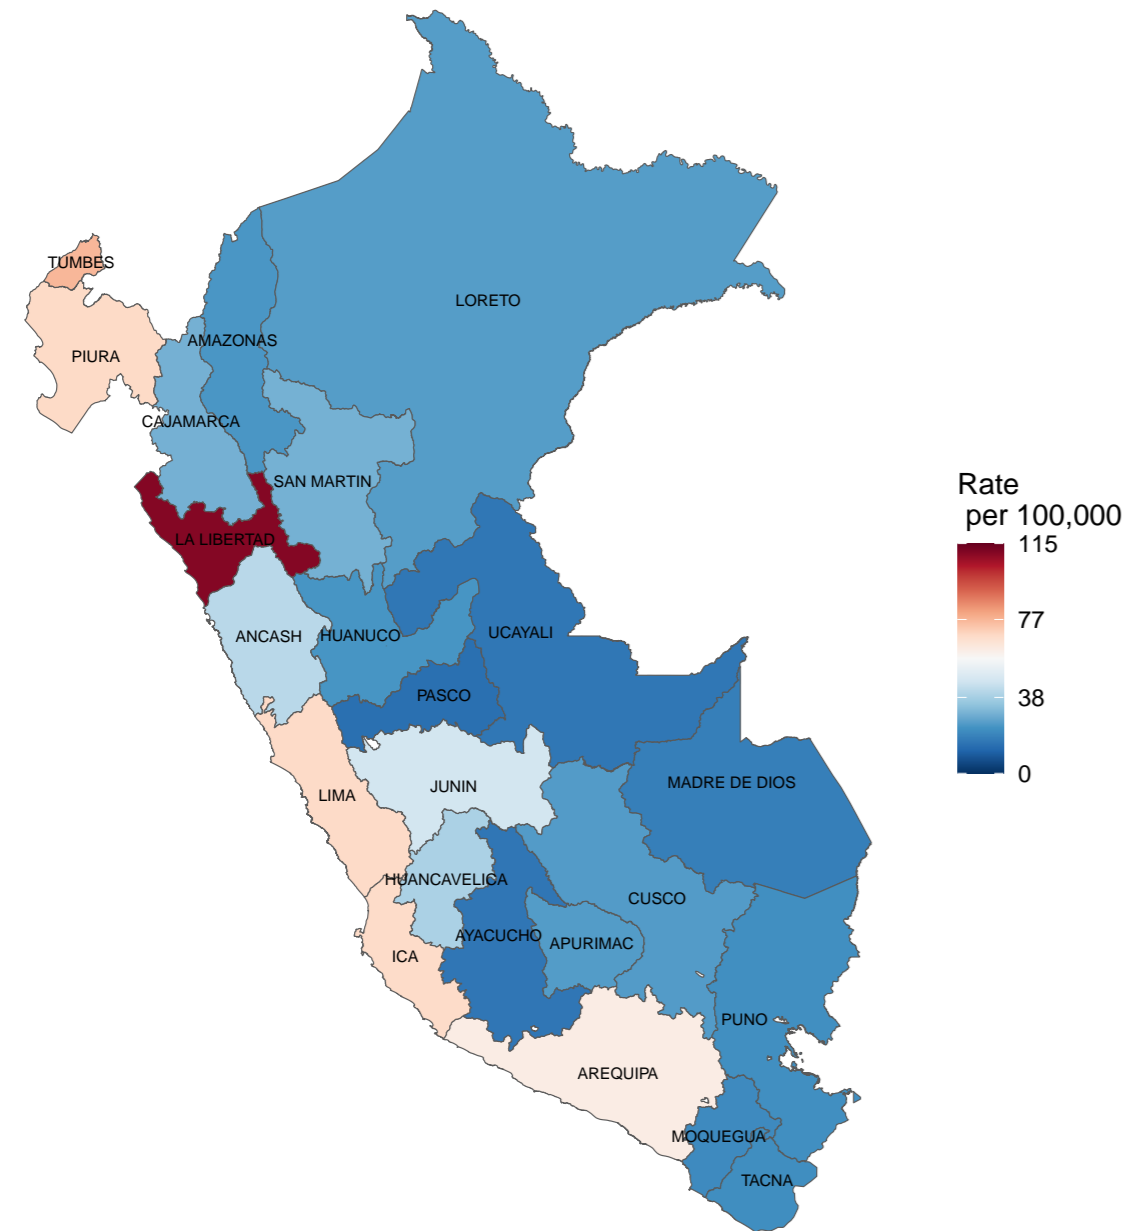

2021

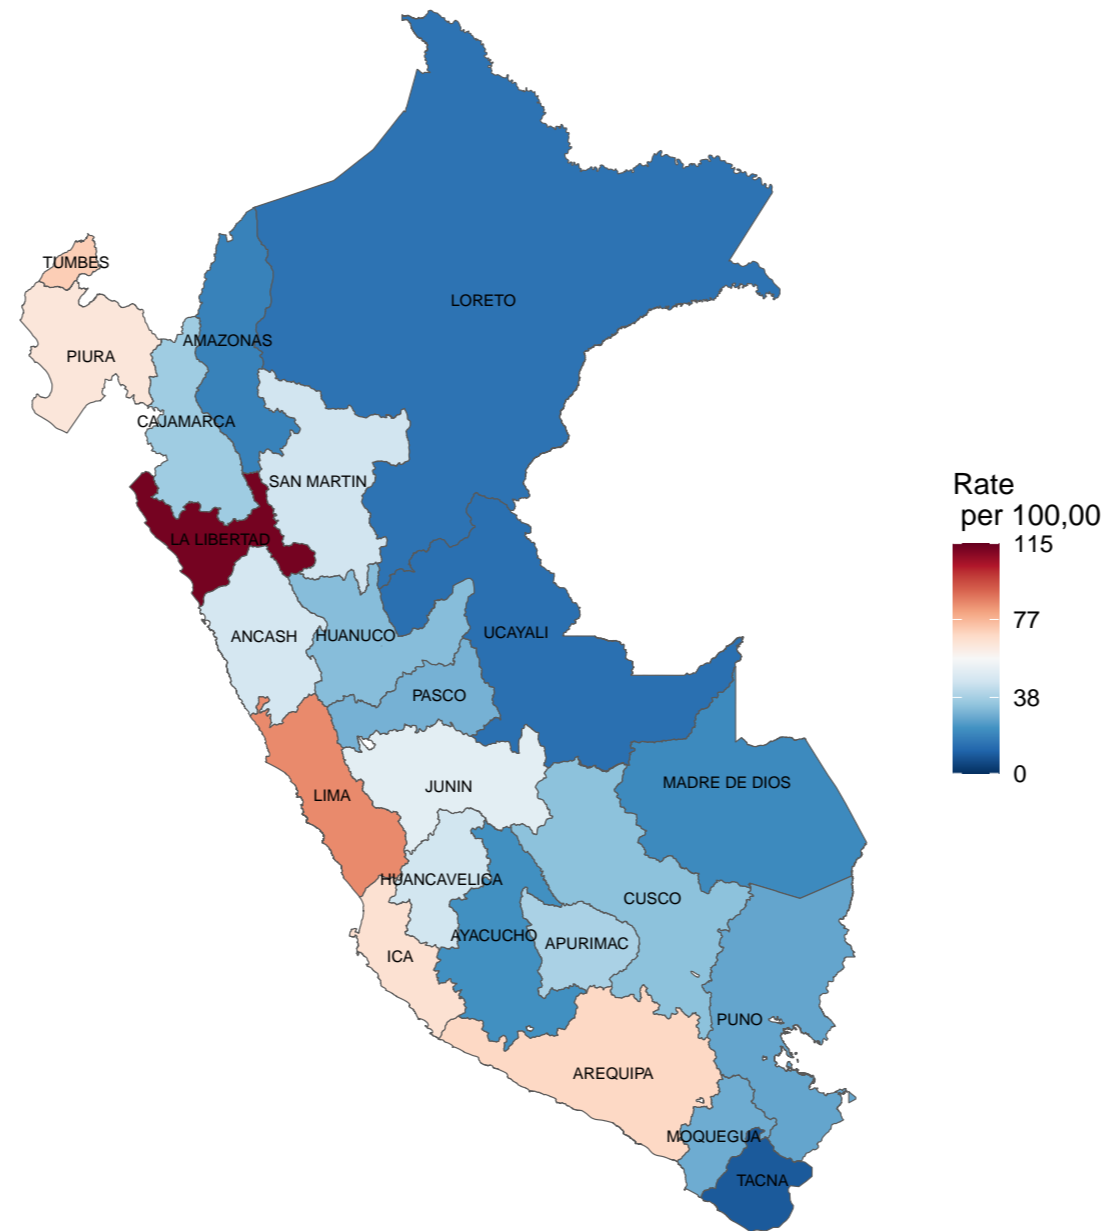

2022

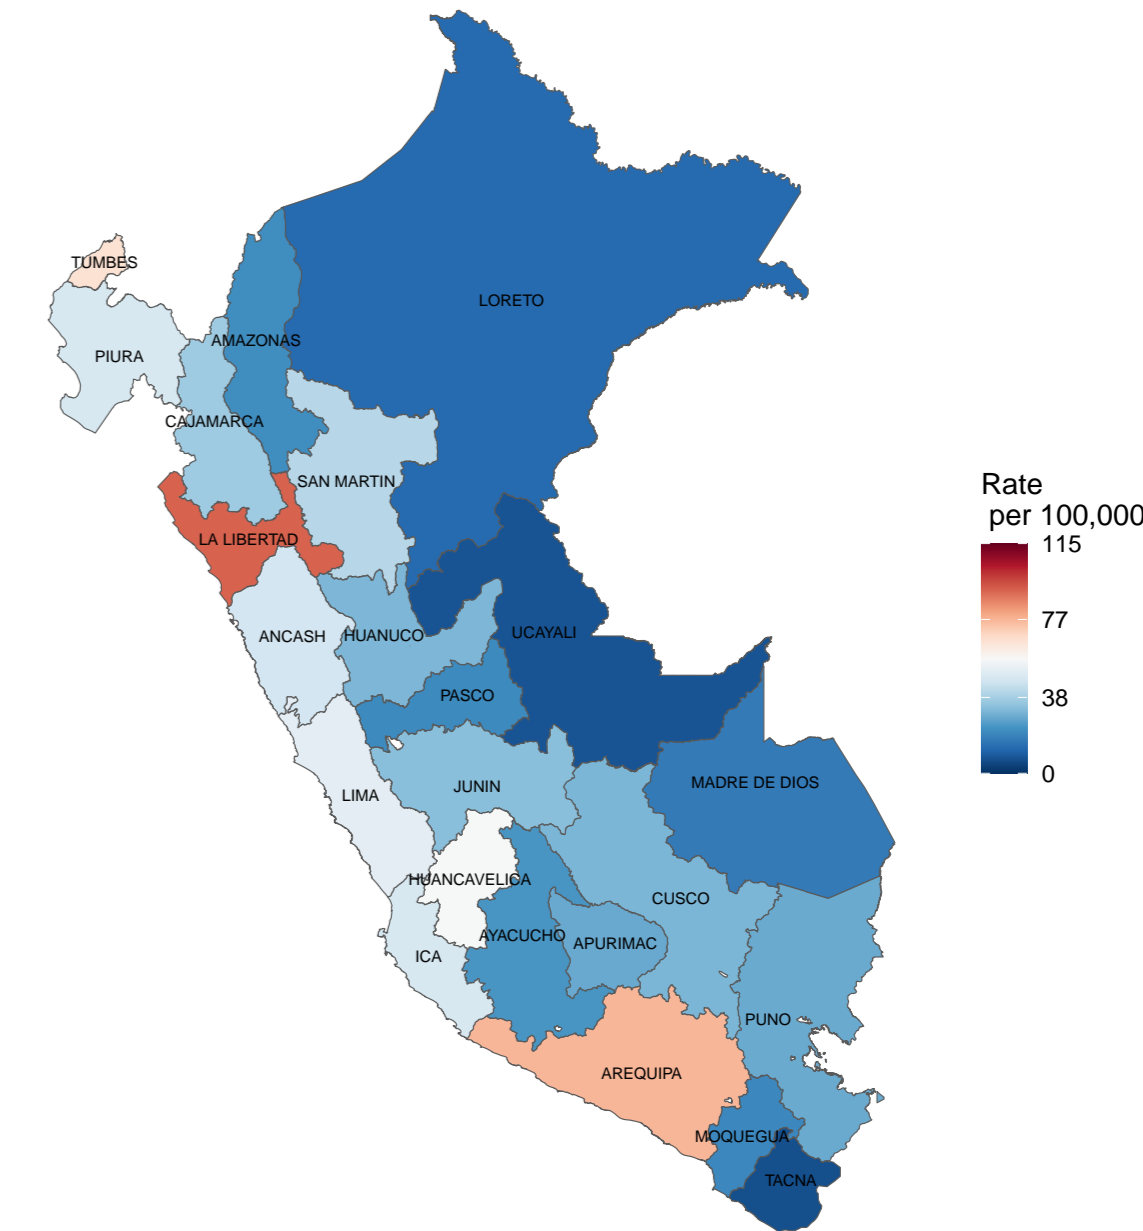

Supplement: mmc4.pdf [file mmc4.pdf]
