# Supplementary material for: A comprehensive analysis of cardiovascular mortality trends in Peru from 2017 to 2022: Insights from 183,386 deaths of the national death registry
Source: PubMed Central journal article supplement (PMC10946053; doi:10.1016/j.ahjo.2023.100335), 2023-10-20
Supplement: mmc6.pdf [file mmc6.pdf]

Supplementary Figure 5. Geographic and temporal profiles of deaths caused by cerebrovascular diseases in Peru between 2017 and 2022

2017

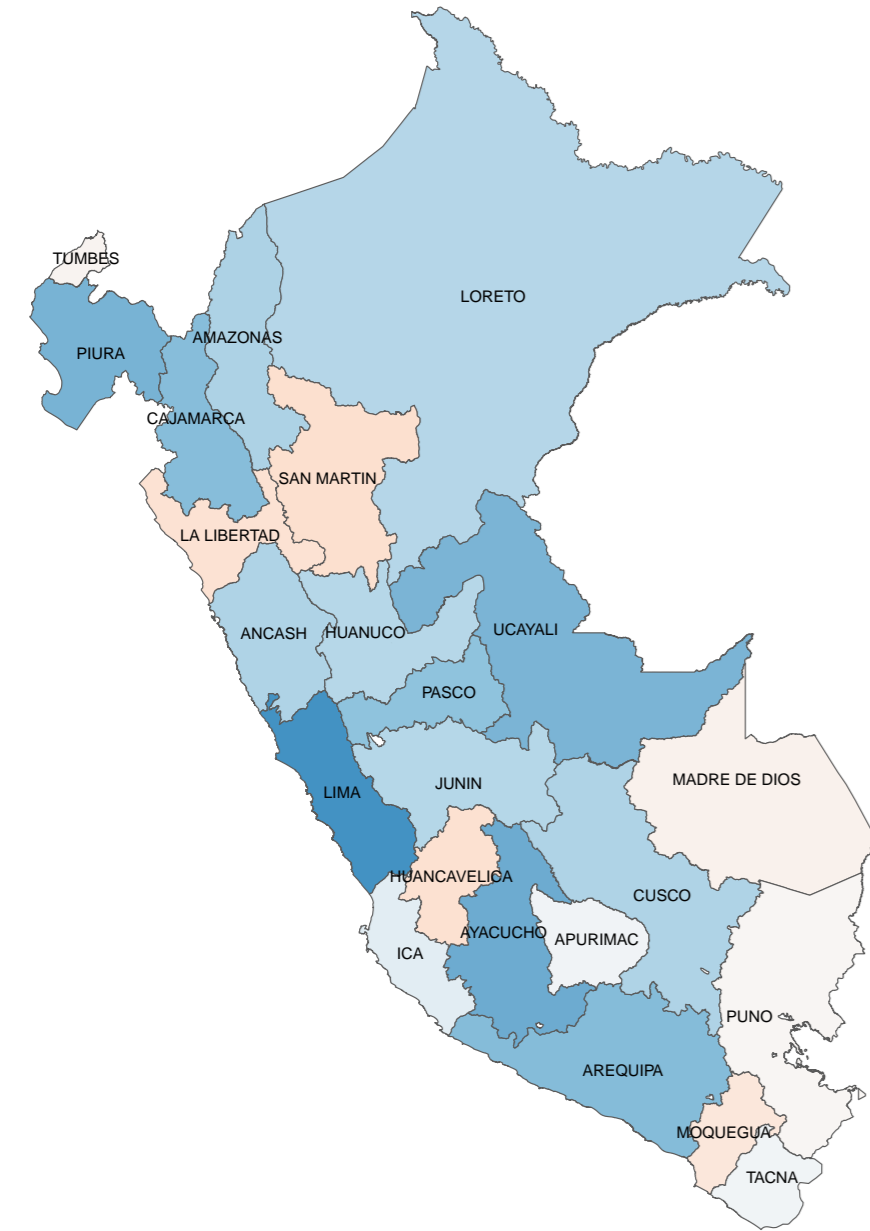

Rate  
per 100,000  
55  
37  
18  
0

2018

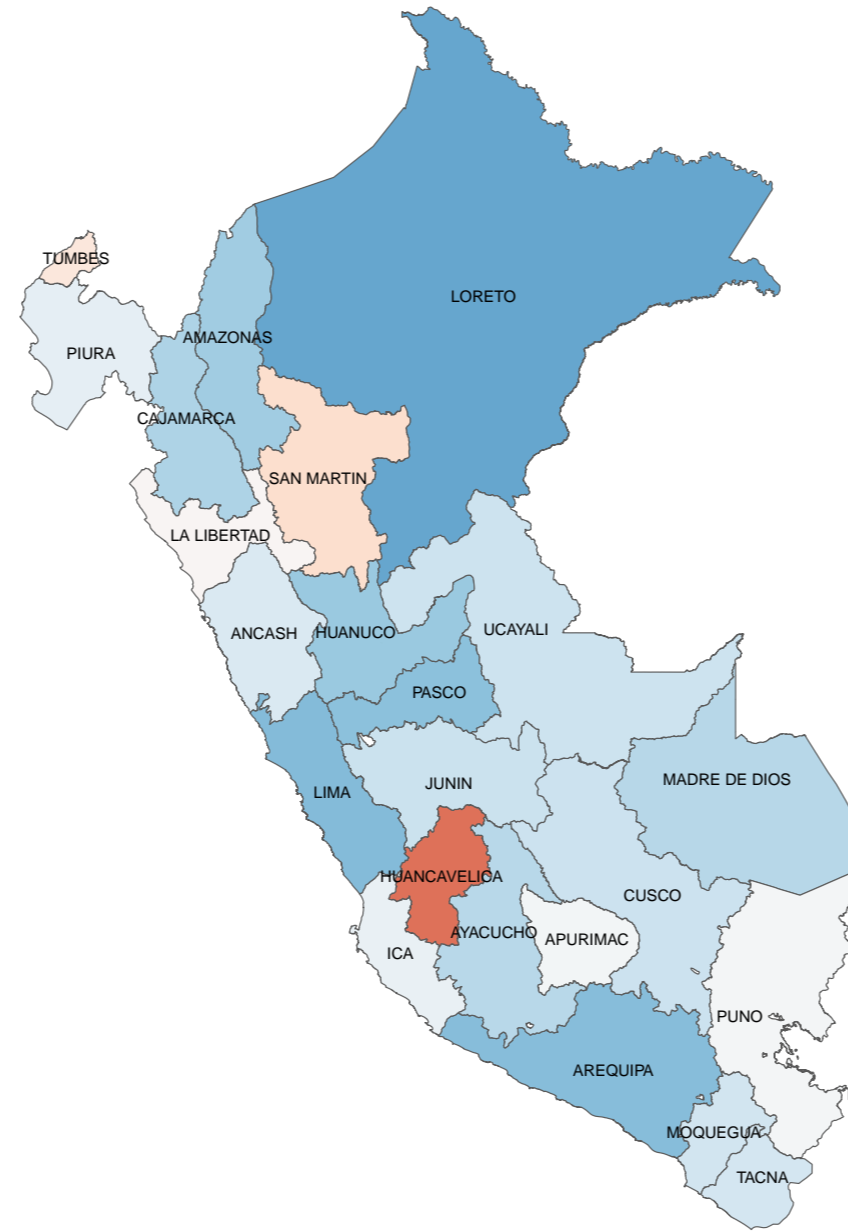

Rate  
per 100,000  
55  
37  
18  
0

2019

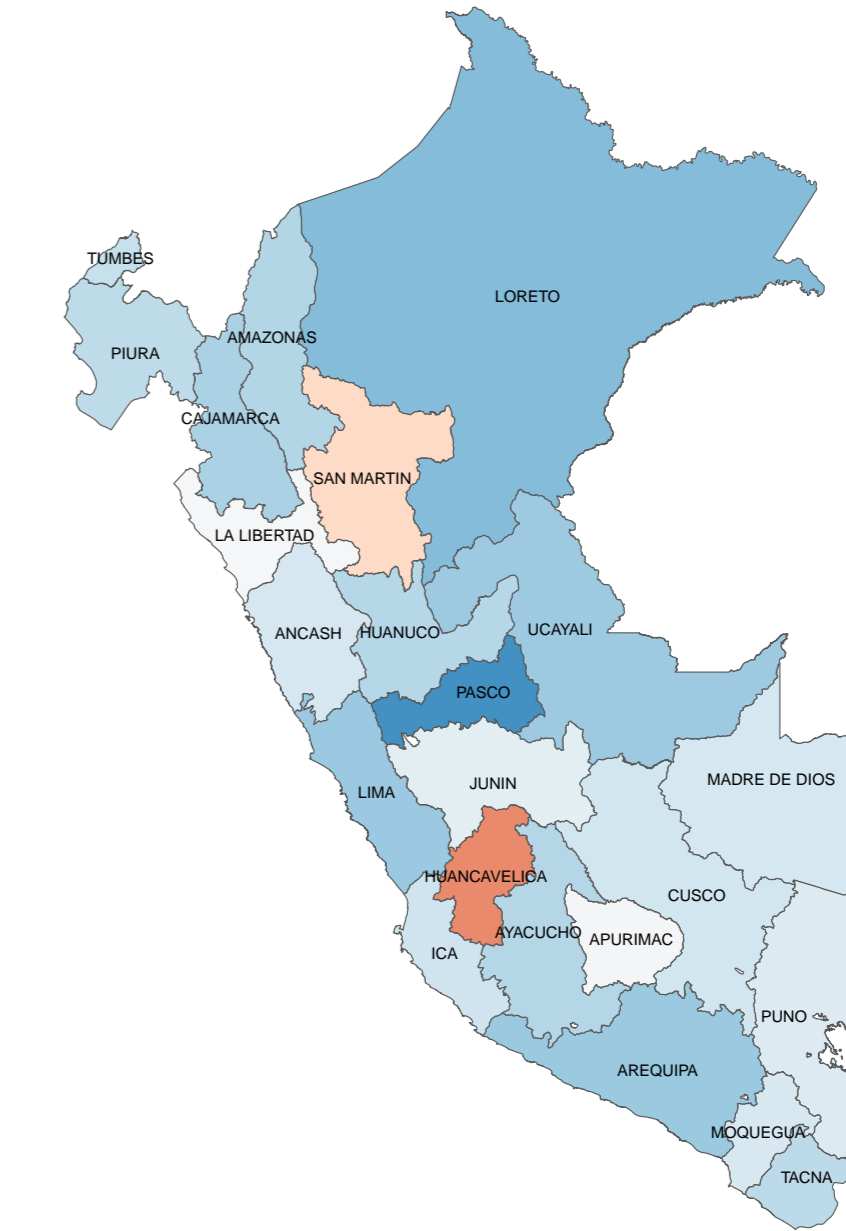

Rate  
per 100,000  
55  
37  
18  
0

2020

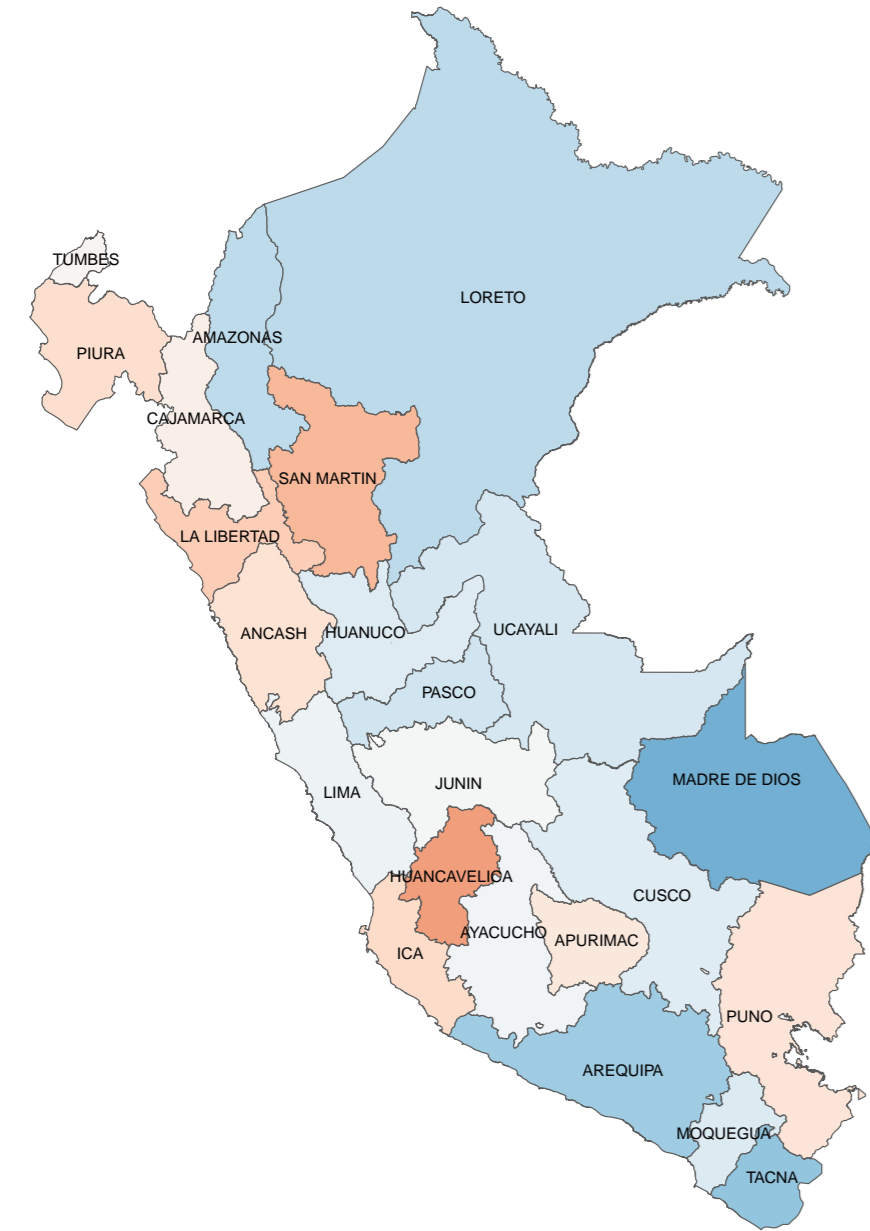

Rate  
per 100,000  
55  
37  
18  
0

2021

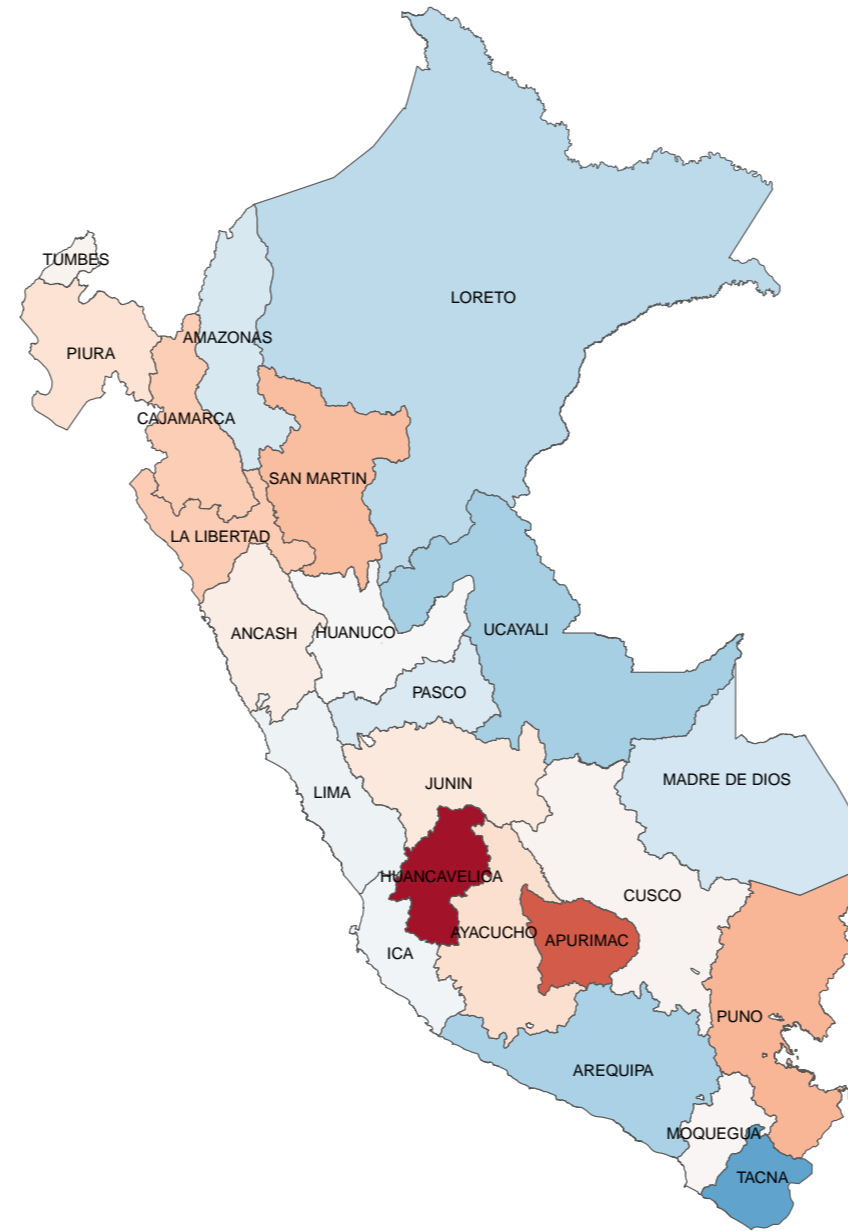

Rate  
per 100,000  
55  
37  
18  
0

2022

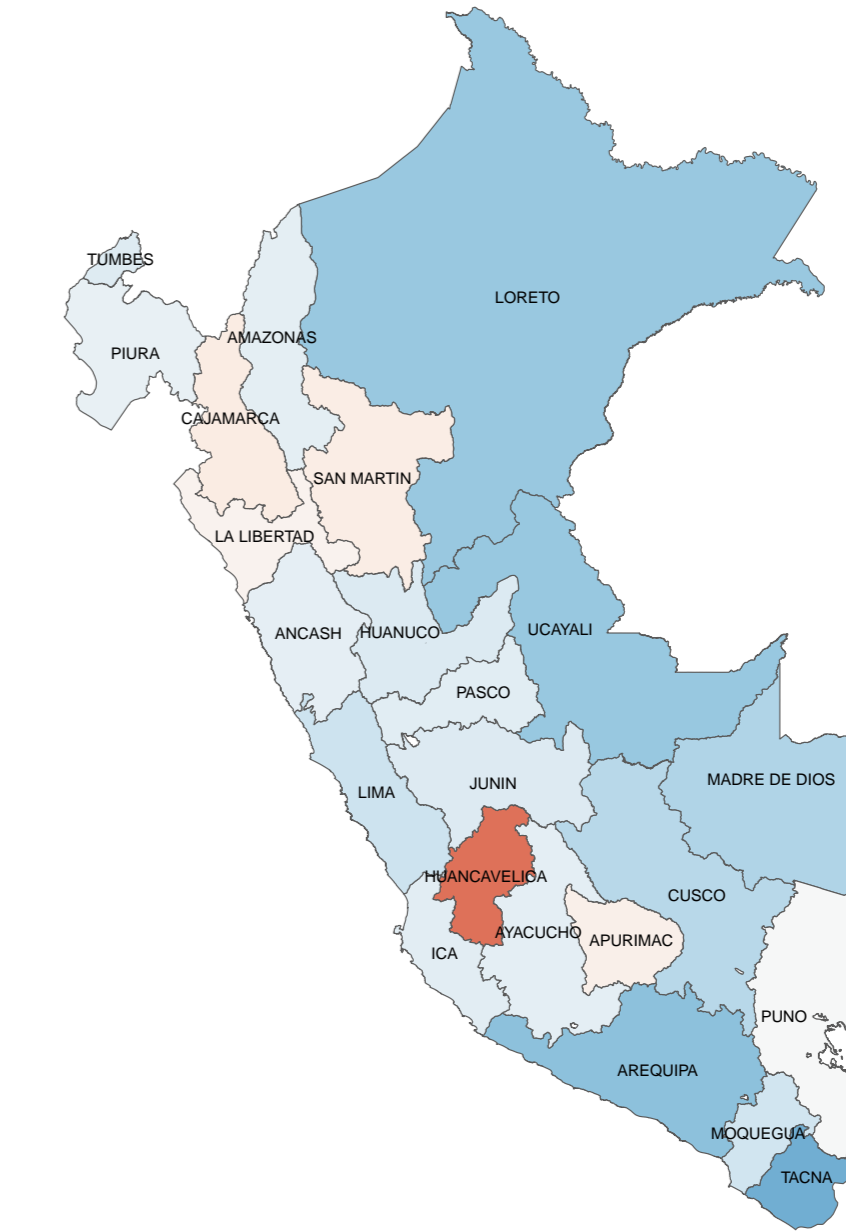

Rate  
per 100,000  
55  
37  
18  
0
